# Supplementary material for: New Evidence for the Role of Pituitary Adenylate Cyclase-Activating Polypeptide as an Antimicrobial Peptide in Teleost Fish
Source: MDPI journal article supplement (doi:10.3390/antibiotics12101484), 2023-09-27
Supplement: s1 [file s1]

# New Evidence for the Role of PACAP as an Antimicrobial Peptide in Teleost Fish

Janet Velázquez <sup>1</sup>, Tania Rodríguez-Cornejo <sup>2</sup>, Tania Rodríguez-Ramos <sup>2</sup>, Geysi Pérez-Rodríguez <sup>1</sup>, Laura Rivera <sup>2</sup>, James Hugh Campbell <sup>2</sup>, Lowia Al-Hussiney <sup>2</sup>, Yamila Carpio <sup>1,\*</sup>, Mario Pablo Estrada <sup>1,\*</sup> and Brian Dixon <sup>2,\*</sup>

<sup>1</sup> Veterinary Immunology Project, Animal Biotechnology Department, Center for Genetic Engineering and Biotechnology (CIGB), P.O. Box 6162, Havana 10600, Cuba; [janet.velazquez@cigb.edu.cu](mailto:janet.velazquez@cigb.edu.cu) (J.V.); [gey9412@gmail.com](mailto:gey9412@gmail.com) (G.P.-R.)

<sup>2</sup> Department of Biology, University of Waterloo, 200 University Ave W., Waterloo, ON, N2L3G1, Canada; [tania.rodriguez@upch.pe](mailto:tania.rodriguez@upch.pe) (T.R.-C.); [tania.rodriguez-ramos@uwaterloo.ca](mailto:tania.rodriguez-ramos@uwaterloo.ca) (T.R.-R.); [lrivera@uwaterloo.ca](mailto:lrivera@uwaterloo.ca) (L.R.); [jhcampbell@uwaterloo.ca](mailto:jhcampbell@uwaterloo.ca) (J.C.); [jlowia@gmail.com](mailto:jlowia@gmail.com) (L.A.-H.)

\* Correspondence: [yamila.carpio@cigb.edu.cu](mailto:yamila.carpio@cigb.edu.cu) (Y. C.), [mario.pablo@cigb.edu.cu](mailto:mario.pablo@cigb.edu.cu) (M. P. E.) and [bdixon@uwaterloo.ca](mailto:bdixon@uwaterloo.ca) (B. D.)

**Supplementary Table S1.** Molecular identification of *Yersinia ruckeri* 16S rRNA gene in rainbow trout (*Oncorhynchus mykiss*) by qRT-PCR

| Control Group |                  | Infected Group |                  |
|---------------|------------------|----------------|------------------|
| Sample        | Mean of CT value | Sample         | Mean of CT value |
| Control 3     | 31.46            | Infected 1     | 13.68            |
| Control 4     | 32.91            | Infected 2     | 14.24            |
| Control 5     | 32.87            | Infected 3     | 13.40            |
| Control 6     | 31.35            | Infected 4     | 14.39            |
| Control 7     | 33.03            | Infected 5     | 12.30            |
| Control 8     | 30.60            | Infected 6     | 13.61            |
| Control 9     | 30.99            | Infected 7     | 13.33            |
| Control 10    | 33.28            | Infected 8     | 15.47            |
| Control 11    | 31.69            | Infected 9     | 15.27            |
| Control 12    | 31.61            | Infected 10    | 13.68            |
| Control 13    | 32.13            | Infected 11    | 17.52            |
| Control 15    | 33.66            | Infected 12    | 13.49            |
| Control 16    | 31.06            | Infected 13    | 13.69            |
| Control 17    | 32.28            | Infected 14    | 13.39            |
| Control 18    | 33.32            | Infected 15    | 15.56            |
| Control 19    | 32.40            | Infected 16    | 14.85            |
| Control 20    | 31.38            | Infected 17    | 20.57            |
| Control 21    | 32.58            | Infected 18    | 15.30            |
| Control 22    | 32.91            | Infected 19    | 15.44            |
| Control 23    | 32.24            | Infected 20    | 13.17            |
| Control 24    | 31.33            | Infected 21    | 18.51            |
| Control 25    | 31.68            | Infected 22    | 17.46            |
| Control 26    | 34.84            | Infected 23    | 23.98            |
| Control 27    | 35.13            | Infected 24    | 21.56            |
| Control 34    | 32.68            | Infected 25    | 16.86            |
| Control 35    | 30.98            | Infected 26    | 20.55            |
| Control 37    | 30.72            | Infected 27    | 28.12            |
|               |                  | Infected 28    | 13.15            |
|               |                  | Infected 29    | 15.11            |
|               |                  | Infected 30    | 19.68            |
|               |                  | Infected 31    | 16.87            |
|               |                  | Infected 32    | 21.77            |
| Average       | 32.26            | Average        | 16.44            |
| SD            | 1.16             | SD             | 3.70             |

**Supplementary Table S2.** Statistical analyzed performed to the direct antimicrobial activity of synthetic *Clarias gariepinus* PACAP-38 against a *Y. ruckeri* isolate by broth microdilution peptide assay in Luria-Bertani broth

| Tukey's multiple comparisons test        | Summary | Adjusted P Value |
|------------------------------------------|---------|------------------|
| <b>0 <math>\mu</math>M CgPACAP-38</b>    |         |                  |
| NaCl 1% vs. NaCl 0.5%                    | ns      | >0.9999          |
| NaCl 1% vs. NaCl 0%                      | ns      | >0.9999          |
| NaCl 0.5% vs. NaCl 0%                    | ns      | >0.9999          |
| <b>2.5 <math>\mu</math>M CgPACAP-38</b>  |         |                  |
| NaCl 1% vs. NaCl 0.5%                    | *       | 0.0358           |
| NaCl 1% vs. NaCl 0%                      | ***     | 0.0007           |
| NaCl 0.5% vs. NaCl 0%                    | ns      | 0.1502           |
| <b>12.5 <math>\mu</math>M CgPACAP-38</b> |         |                  |
| NaCl 1% vs. NaCl 0.5%                    | **      | 0.0038           |
| NaCl 1% vs. NaCl 0%                      | ****    | <0.0001          |
| NaCl 0.5% vs. NaCl 0%                    | ****    | <0.0001          |
| <b>25 <math>\mu</math>M CgPACAP-38</b>   |         |                  |
| NaCl 1% vs. NaCl 0.5%                    | ****    | <0.0001          |
| NaCl 1% vs. NaCl 0%                      | ****    | <0.0001          |
| NaCl 0.5% vs. NaCl 0%                    | ns      | 0.1956           |
| <b>50 <math>\mu</math>M CgPACAP-38</b>   |         |                  |
| NaCl 1% vs. NaCl 0.5%                    | ***     | 0.0003           |
| NaCl 1% vs. NaCl 0%                      | ***     | 0.0001           |
| NaCl 0.5% vs. NaCl 0%                    | ns      | 0.8931           |

**Supplementary Table S3.** Statistical analyzed performed to the direct antimicrobial activity of synthetic human PACAP-38 against a *Y. ruckeri* isolate by broth microdilution peptide assay in Luria-Bertani broth

| Tukey's multiple comparisons test       | Summary | Adjusted P Value |
|-----------------------------------------|---------|------------------|
| <b>0 <math>\mu</math>M hPACAP-38</b>    |         |                  |
| NaCl 1% vs. NaCl 0.5%                   | ns      | >0.9999          |
| NaCl 1% vs. NaCl 0%                     | ns      | >0.9999          |
| NaCl 0.5% vs. NaCl 0%                   | ns      | >0.9999          |
| <b>2.5 <math>\mu</math>M hPACAP-38</b>  |         |                  |
| NaCl 1% vs. NaCl 0.5%                   | ns      | 0.0569           |
| NaCl 1% vs. NaCl 0%                     | ****    | <0.0001          |
| NaCl 0.5% vs. NaCl 0%                   | ****    | <0.0001          |
| <b>12.5 <math>\mu</math>M hPACAP-38</b> |         |                  |
| NaCl 1% vs. NaCl 0.5%                   | ****    | <0.0001          |
| NaCl 1% vs. NaCl 0%                     | ****    | <0.0001          |
| NaCl 0.5% vs. NaCl 0%                   | ****    | <0.0001          |
| <b>25 <math>\mu</math>M hPACAP-38</b>   |         |                  |
| NaCl 1% vs. NaCl 0.5%                   | ****    | <0.0001          |
| NaCl 1% vs. NaCl 0%                     | ****    | <0.0001          |
| NaCl 0.5% vs. NaCl 0%                   | ****    | <0.0001          |
| <b>50 <math>\mu</math>M hPACAP-38</b>   |         |                  |
| NaCl 1% vs. NaCl 0.5%                   | ****    | <0.0001          |
| NaCl 1% vs. NaCl 0%                     | ****    | <0.0001          |
| NaCl 0.5% vs. NaCl 0%                   | ***     | 0.0009           |

**Supplementary Table S4.** Statistical analyzed performed to the quantification of *Y. ruckeri* by standard plate count (SPC) of cell culture media during live infection (MOI of 0.001) of PACAP-treated RTS11

| Uncorrected Fisher's LSD                           | Summary | Individual P Value |
|----------------------------------------------------|---------|--------------------|
| No PACAP vs. hPACAP-38                             | ns      | 0.1049             |
| No PACAP vs. HSP70                                 | ns      | 0.4080             |
| No PACAP vs. CgPACAP-38 0.02 $\mu$ M               | ns      | 0.0848             |
| No PACAP vs. CgPACAP-38 0.1 $\mu$ M                | *       | 0.0237             |
| hPACAP-38 vs. HSP70                                | ns      | 0.3743             |
| hPACAP-38 vs. CgPACAP-38 0.02 $\mu$ M              | ns      | 0.8967             |
| hPACAP-38 vs. CgPACAP-38 0.1 $\mu$ M               | ns      | 0.2979             |
| HSP70 vs. CgPACAP-38 0.02 $\mu$ M                  | ns      | 0.3132             |
| HSP70 vs. CgPACAP-38 0.1 $\mu$ M                   | ns      | 0.0842             |
| CgPACAP-38 0.02 $\mu$ M vs. CgPACAP-38 0.1 $\mu$ M | ns      | 0.3502             |

**Supplementary Table S5.** Statistical analyzed performed to the relative expression levels of pro-inflammatory cytokines in RTS11 cells during live infection with *Y. ruckeri* (MOI of 0.001) after PACAP pre-treatment

| Uncorrected Fisher's LSD                           | Summary | Individual P Value |
|----------------------------------------------------|---------|--------------------|
| <b>IL-1<math>\beta</math></b>                      |         |                    |
| No PACAP vs. hPACAP-38                             | ns      | 0.3569             |
| No PACAP vs. HSP70                                 | ns      | 0.6856             |
| No PACAP vs. CgPACAP-38 0.02 $\mu$ M               | ns      | 0.8416             |
| No PACAP vs. CgPACAP-38 0.1 $\mu$ M                | ns      | 0.3987             |
| hPACAP-38 vs. HSP70                                | ns      | 0.1982             |
| hPACAP-38 vs. CgPACAP-38 0.02 $\mu$ M              | ns      | 0.2695             |
| hPACAP-38 vs. CgPACAP-38 0.1 $\mu$ M               | ns      | 0.1132             |
| HSP70 vs. CgPACAP-38 0.02 $\mu$ M                  | ns      | 0.8365             |
| HSP70 vs. CgPACAP-38 0.1 $\mu$ M                   | ns      | 0.6210             |
| CgPACAP-38 0.02 $\mu$ M vs. CgPACAP-38 0.1 $\mu$ M | ns      | 0.5004             |
| <b>IL-6</b>                                        |         |                    |
| No PACAP vs. hPACAP-38                             | ns      | 0.0952             |
| No PACAP vs. HSP70                                 | ns      | 0.8464             |
| No PACAP vs. CgPACAP-38 0.02 $\mu$ M               | ns      | 0.9911             |
| No PACAP vs. CgPACAP-38 0.1 $\mu$ M                | ns      | 0.2870             |
| hPACAP-38 vs. HSP70                                | ns      | 0.0691             |
| hPACAP-38 vs. CgPACAP-38 0.02 $\mu$ M              | ns      | 0.0935             |
| hPACAP-38 vs. CgPACAP-38 0.1 $\mu$ M               | *       | 0.0207             |
| HSP70 vs. CgPACAP-38 0.02 $\mu$ M                  | ns      | 0.8551             |
| HSP70 vs. CgPACAP-38 0.1 $\mu$ M                   | ns      | 0.3653             |
| CgPACAP-38 0.02 $\mu$ M vs. CgPACAP-38 0.1 $\mu$ M | ns      | 0.2911             |
| <b>TNF-<math>\alpha</math></b>                     |         |                    |
| No PACAP vs. hPACAP-38                             | ns      | 0.0653             |
| No PACAP vs. HSP70                                 | ns      | 0.8431             |
| No PACAP vs. CgPACAP-38 0.02 $\mu$ M               | ns      | 0.8428             |
| No PACAP vs. CgPACAP-38 0.1 $\mu$ M                | ns      | 0.5128             |
| hPACAP-38 vs. HSP70                                | *       | 0.0468             |
| hPACAP-38 vs. CgPACAP-38 0.02 $\mu$ M              | *       | 0.0468             |
| hPACAP-38 vs. CgPACAP-38 0.1 $\mu$ M               | *       | 0.0308             |
| HSP70 vs. CgPACAP-38 0.02 $\mu$ M                  | ns      | 0.9997             |
| HSP70 vs. CgPACAP-38 0.1 $\mu$ M                   | ns      | 0.6297             |
| CgPACAP-38 0.02 $\mu$ M vs. CgPACAP-38 0.1 $\mu$ M | ns      | 0.6299             |

|                                                    |    |        |
|----------------------------------------------------|----|--------|
| <b>IFN-<math>\gamma</math></b>                     |    |        |
| No PACAP vs. hPACAP-38                             | ns | 0.6968 |
| No PACAP vs. HSP70                                 | ns | 0.9985 |
| No PACAP vs. CgPACAP-38 0.02 $\mu$ M               | ns | 0.8738 |
| No PACAP vs. CgPACAP-38 0.1 $\mu$ M                | *  | 0.0316 |
| hPACAP-38 vs. HSP70                                | ns | 0.6954 |
| hPACAP-38 vs. CgPACAP-38 0.02 $\mu$ M              | ns | 0.5854 |
| hPACAP-38 vs. CgPACAP-38 0.1 $\mu$ M               | ns | 0.0569 |
| HSP70 vs. CgPACAP-38 0.02 $\mu$ M                  | ns | 0.8754 |
| HSP70 vs. CgPACAP-38 0.1 $\mu$ M                   | *  | 0.0315 |
| CgPACAP-38 0.02 $\mu$ M vs. CgPACAP-38 0.1 $\mu$ M | *  | 0.0248 |

**Supplementary Table S6.** Statistical analyzed performed to the relative expression levels of anti-inflammatory cytokines and MYD88 signal transduction adaptor gene in RTS11 cells during live infection with *Y. ruckeri* (MOI of 0.001) after PACAP pre-treatment

| Uncorrected Fisher's LSD                           | Summary | Individual P Value |
|----------------------------------------------------|---------|--------------------|
| <b>IL-10</b>                                       |         |                    |
| No PACAP vs. hPACAP-38                             | ns      | 0.8981             |
| No PACAP vs. HSP70                                 | ns      | 0.2110             |
| No PACAP vs. CgPACAP-38 0.02 $\mu$ M               | ns      | 0.9434             |
| No PACAP vs. CgPACAP-38 0.1 $\mu$ M                | ns      | 0.8494             |
| hPACAP-38 vs. HSP70                                | ns      | 0.1734             |
| hPACAP-38 vs. CgPACAP-38 0.02 $\mu$ M              | ns      | 0.8423             |
| hPACAP-38 vs. CgPACAP-38 0.1 $\mu$ M               | ns      | 0.7612             |
| HSP70 vs. CgPACAP-38 0.02 $\mu$ M                  | ns      | 0.2347             |
| HSP70 vs. CgPACAP-38 0.1 $\mu$ M                   | ns      | 0.3393             |
| CgPACAP-38 0.02 $\mu$ M vs. CgPACAP-38 0.1 $\mu$ M | ns      | 0.8993             |
| <b>TGF-<math>\beta</math></b>                      |         |                    |
| No PACAP vs. hPACAP-38                             | ns      | 0.9370             |
| No PACAP vs. HSP70                                 | ns      | 0.8007             |
| No PACAP vs. CgPACAP-38 0.02 $\mu$ M               | *       | 0.0487             |
| No PACAP vs. CgPACAP-38 0.1 $\mu$ M                | ns      | 0.6920             |
| hPACAP-38 vs. HSP70                                | ns      | 0.8621             |
| hPACAP-38 vs. CgPACAP-38 0.02 $\mu$ M              | ns      | 0.0558             |
| hPACAP-38 vs. CgPACAP-38 0.1 $\mu$ M               | ns      | 0.7506             |
| HSP70 vs. CgPACAP-38 0.02 $\mu$ M                  | ns      | 0.0753             |
| HSP70 vs. CgPACAP-38 0.1 $\mu$ M                   | ns      | 0.8849             |
| CgPACAP-38 0.02 $\mu$ M vs. CgPACAP-38 0.1 $\mu$ M | ns      | 0.0962             |
| <b>MYD88</b>                                       |         |                    |
| No PACAP vs. hPACAP-38                             | ns      | 0.4056             |
| No PACAP vs. HSP70                                 | ns      | 0.0664             |
| No PACAP vs. CgPACAP-38 0.02 $\mu$ M               | **      | 0.0044             |
| No PACAP vs. CgPACAP-38 0.1 $\mu$ M                | *       | 0.0420             |
| hPACAP-38 vs. HSP70                                | ns      | 0.2552             |
| hPACAP-38 vs. CgPACAP-38 0.02 $\mu$ M              | *       | 0.0177             |
| hPACAP-38 vs. CgPACAP-38 0.1 $\mu$ M               | ns      | 0.1466             |
| HSP70 vs. CgPACAP-38 0.02 $\mu$ M                  | ns      | 0.1267             |
| HSP70 vs. CgPACAP-38 0.1 $\mu$ M                   | ns      | 0.6279             |
| CgPACAP-38 0.02 $\mu$ M vs. CgPACAP-38 0.1 $\mu$ M | ns      | 0.3419             |

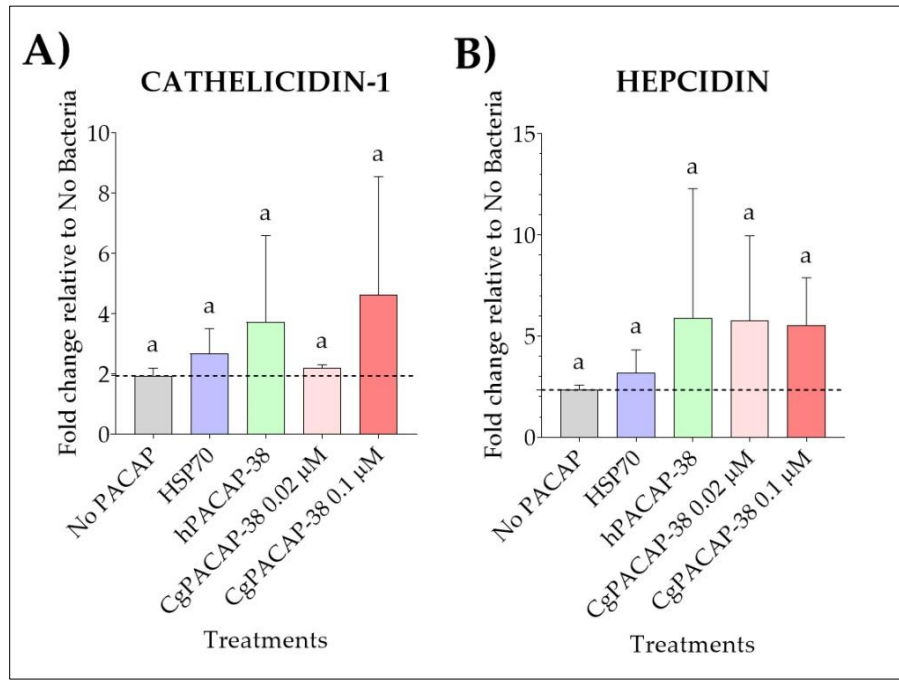

**Supplementary Figure S1.** Relative expression levels of antimicrobial peptides in RTS11 cells during live infection with *Yersinia ruckeri* (MOI of 0.001) after PACAP pre-treatment. RTS11 cells were pre-treated with CgPACAP-38 (0.02 and 0.1 μM), 0.1 μM of hPACAP-38 or 0.1 μM of HSP70 peptide 24 h before the exposure to live *Y. ruckeri* and the relative expression levels of Cathelicidin-1 (**A**) and Hecpudin (**B**) were analyzed on day 3 post-infection (day 4 after PACAP treatment). Relative expression was determined following the  $2^{-\Delta\Delta CT}$  method and EF-1 $\alpha$  was used as the reference gene. Data was expressed as fold change relative to the expression level in the No Bacteria group, and was represented as the mean  $\pm$  SD of 3 experimental replicates. Differences among treatments were considered to be significantly different when compared to the No PACAP control (RTS11 exposed to *Y. ruckeri*, dashed line) by a One-way ANOVA followed by a Fisher's least significant difference (LSD) post-hoc test. Similar lowercase letters represents no statistically significant differences at  $p < 0.05$ .

**Supplementary Table S7.** Statistical analyzed performed to the relative expression levels of antimicrobial peptides in RTS11 cells during live infection with *Y. ruckeri* (MOI of 0.001) after PACAP pre-treatment

| Uncorrected Fisher's LSD                 | Summary | Individual P Value |
|------------------------------------------|---------|--------------------|
| <b>Cathelicidin-1</b>                    |         |                    |
| No PACAP vs. hPACAP-38                   | ns      | 0.3471             |
| No PACAP vs. HSP70                       | ns      | 0.6916             |
| No PACAP vs. CgPACAP-38 0.02 μM          | ns      | 0.8840             |
| No PACAP vs. CgPACAP-38 0.1 μM           | ns      | 0.1658             |
| hPACAP-38 vs. HSP70                      | ns      | 0.5758             |
| hPACAP-38 vs. CgPACAP-38 0.02 μM         | ns      | 0.4221             |
| hPACAP-38 vs. CgPACAP-38 0.1 μM          | ns      | 0.6224             |
| HSP70 vs. CgPACAP-38 0.02 μM             | ns      | 0.8011             |
| HSP70 vs. CgPACAP-38 0.1 μM              | ns      | 0.3028             |
| CgPACAP-38 0.02 μM vs. CgPACAP-38 0.1 μM | ns      | 0.2083             |
| <b>Hecpudin</b>                          |         |                    |
| No PACAP vs. hPACAP-38                   | ns      | 0.2717             |
| No PACAP vs. HSP70                       | ns      | 0.7830             |
| No PACAP vs. CgPACAP-38 0.02 μM          | ns      | 0.2892             |

|                                                    |    |        |
|----------------------------------------------------|----|--------|
| No PACAP vs. CgPACAP-38 0.1 $\mu$ M                | ns | 0.3741 |
| hPACAP-38 vs. HSP70                                | ns | 0.3980 |
| hPACAP-38 vs. CgPACAP-38 0.02 $\mu$ M              | ns | 0.9652 |
| hPACAP-38 vs. CgPACAP-38 0.1 $\mu$ M               | ns | 0.9131 |
| HSP70 vs. CgPACAP-38 0.02 $\mu$ M                  | ns | 0.4214 |
| HSP70 vs. CgPACAP-38 0.1 $\mu$ M                   | ns | 0.5127 |
| CgPACAP-38 0.02 $\mu$ M vs. CgPACAP-38 0.1 $\mu$ M | ns | 0.9442 |
